# Supplementary material
Source: publisher figshare collection journal article supplement (https://sage.figshare.com/ndownloader/files/17763344)
Supplement: Supplementary file 1 [file 17763344]

## Appendix C. Calculation of coal consumption in prefecture-level city

Coal is the most important fossil fuel for China (Miao, 2017), however, data on coal consumption are not available at the prefecture level (Cao et al., 2019). We can only access to the data of coal consumption across provincial level, which is obtained from *China Energy Statistical Yearbook* (2004–2017). Considering the fact that the energy consumption of the secondary industry accounted for 71.5% of the total energy consumed (Shao et al., 2016; Yang et al., 2018), and leads to high environment pollution (Yin et al., 2019). Thus, we take the proportion of the per secondary industry output of sample cities in their home provinces as the weight value ( $W$ ), then the province-level coal consumption is allocated to each prefecture-level city using this weight value ( $W$ ). We also take the ratio of the per capita GDP of sample city in their home provinces as another weight value ( $WR$ ) for robust analysis, the results using different weights are relatively consistent with each other.

### **References:**

- Afsah, S., Ness, E., 2008. Carbon Monitoring for Action (CARMA): Climate campaign built on questionable data: A due diligence report on CARMA's data and methodology. Social Science Electronic Publishing.
- Cao, X., Kostka, G., Xu, X., 2019. Environmental political business cycles: The case of PM2.5 air pollution in Chinese prefectures. *Environmental Science & Policy* 93, 92–100.
- Miao, L., 2017. Examining the impact factors of urban residential energy consumption and CO<sub>2</sub> emissions in China: Evidence from city-level data. *Ecological Indicators* 73, 29–37.
- Shao, S., Yang, L., Gan, C., Cao, J., Geng, Y., Guan, D., 2016. Using an extended LMDI model to explore techno-economic drivers of energy-related industrial CO<sub>2</sub> emission changes: A case study for Shanghai (China). *Renewable & Sustainable Energy Reviews* 55, 516–536.
- Yang, M., Ma, T., Sun, C., 2018. Evaluating the impact of urban traffic investment on SO<sub>2</sub> emissions in China cities. *Energy Policy* 113, 20–27.
- Yin, W., Kirkulak-Uludag, B., Zhang, S., 2019. Is financial development in China green?: Evidence from city level data. *Journal of Cleaner Production* 211, 247–256.
